# Supplementary material for: Activating Mucosal-Associated Invariant T Cells Induces a Broad Antitumor Response
Source: Oxford University Press journal article supplement (doi:10.1158/2326-6066.cir-20-0925), 2021-06-30
Supplement: 23266066cir200925-sup-255129_3_supp_7115526_qv7stq.xlsx [file 23266066cir200925-sup-255129_3_supp_7115526_qv7stq.xlsx]

## Sheet: Supplementary Table S1
Supplementary Table S1. Single-guide RNAs targeting protein coding exons of Mr1
Mr1_1911	TTTCGAGTTGTTCTTACCACTGG
Mr1_1912	GTATTGCAACTCATGCAGGTTGG
Mr1_1913	ACACTGTCGTATGTAGTGATAGG
Mr1_1914	AATTCAGGGACGACGGGACCAGG
Mr1_1915	GACGAAAATATCTCAGCGAGTGG
Mr1_1916	ACGAAAATATCTCAGCGAGTGGG
*PAM sequence in bold

## Sheet: Supplementary Table S2
Supplementary Table S2. Primers for targeted next-generation sequencing
Mr1-NGS-F	TCCCTACACGACGCTCTTCCGATCT CAGTGATCAGGTGCCAGGTT
Mr1-NGS-R	GTTCAGACGTGTGCTCTTCCGATCT TGTGACTCTCAACGCCTTCC
Mr1-1913-F	CACC G ACACTGTCGTATGTAGTGAT
Mr1-1913-R	AAAC ATCACTACATACGACAGTGT C
NTC-F	CACC G GTGTCGTGATGCGTAGACGG
NTC-R	AAAC CCGTCTACGCATCACGACAC C
*Primer sequence in red correponds to genomic location
NTC= non-targeting control

## Sheet: Supplementary Table S3
Supplementary Table S3. Summary of edited alleles
Sample	Indel(s) detected
B16-F10-III-5	6 bp deletion; 11 bp deletion; 1 bp insertion (T)
B16-F10-IV-1	6 bp deletion; 11 bp deletion; 1 bp insertion (T)
B16-F10-II-1	31 bp deletion; 12 bp deletion; 1 bp insertion (T)
